# Supplementary material for: Characterization of Viral miRNAs during Adenovirus 14 Infection and Their Differential Expression in the Emergent Strain Adenovirus 14p1
Source: MDPI journal article supplement (doi:10.3390/v14050898), 2022-04-26
Supplement: s1 [file s1]

## KEGG Results

### Pathways (number of targets)

- [hsa01100](#) Metabolic pathways - Homo sapiens (human) (141)
- [hsa05200](#) Pathways in cancer - Homo sapiens (human) (73)
- [hsa04151](#) PI3K-Akt signaling pathway - Homo sapiens (human) (49)
- [hsa05022](#) Pathways of neurodegeneration - multiple diseases - Homo sapiens (human) (42)
- [hsa05205](#) Proteoglycans in cancer - Homo sapiens (human) (41)
- [hsa05168](#) Herpes simplex virus 1 infection - Homo sapiens (human) (40)
- [hsa05165](#) Human papillomavirus infection - Homo sapiens (human) (40)
- [hsa04010](#) MAPK signaling pathway - Homo sapiens (human) (37)
- [hsa04810](#) Regulation of actin cytoskeleton - Homo sapiens (human) (36)
- [hsa04024](#) cAMP signaling pathway - Homo sapiens (human) (35)
- [hsa04360](#) Axon guidance - Homo sapiens (human) (33)
- [hsa05224](#) Breast cancer - Homo sapiens (human) (32)
- [hsa04015](#) Rap1 signaling pathway - Homo sapiens (human) (32)
- [hsa04510](#) Focal adhesion - Homo sapiens (human) (32)
- [hsa04150](#) mTOR signaling pathway - Homo sapiens (human) (31)
- [hsa04020](#) Calcium signaling pathway - Homo sapiens (human) (31)
- [hsa04014](#) Ras signaling pathway - Homo sapiens (human) (31)
- [hsa04310](#) Wnt signaling pathway - Homo sapiens (human) (29)
- [hsa05131](#) Shigellosis - Homo sapiens (human) (29)
- [hsa04921](#) Oxytocin signaling pathway - Homo sapiens (human) (29)
- [hsa05014](#) Amyotrophic lateral sclerosis - Homo sapiens (human) (28)
- [hsa04934](#) Cushing syndrome - Homo sapiens (human) (28)
- [hsa05010](#) Alzheimer disease - Homo sapiens (human) (28)
- [hsa04144](#) Endocytosis - Homo sapiens (human) (28)
- [hsa04530](#) Tight junction - Homo sapiens (human) (27)
- [hsa05163](#) Human cytomegalovirus infection - Homo sapiens (human) (27)
- [hsa04080](#) Neuroactive ligand-receptor interaction - Homo sapiens (human) (27)
- [hsa04550](#) Signaling pathways regulating pluripotency of stem cells - Homo sapiens (human) (26)
- [hsa04022](#) cGMP-PKG signaling pathway - Homo sapiens (human) (26)
- [hsa05206](#) MicroRNAs in cancer - Homo sapiens (human) (25)
- [hsa04390](#) Hippo signaling pathway - Homo sapiens (human) (25)
- [hsa05202](#) Transcriptional misregulation in cancer - Homo sapiens (human) (25)
- [hsa04270](#) Vascular smooth muscle contraction - Homo sapiens (human) (24)
- [hsa04261](#) Adrenergic signaling in cardiomyocytes - Homo sapiens (human) (24)
- [hsa05225](#) Hepatocellular carcinoma - Homo sapiens (human) (23)
- [hsa04120](#) Ubiquitin mediated proteolysis - Homo sapiens (human) (23)
- [hsa05161](#) Hepatitis B - Homo sapiens (human) (23)
- [hsa04068](#) FoxO signaling pathway - Homo sapiens (human) (22)
- [hsa04114](#) Oocyte meiosis - Homo sapiens (human) (22)
- [hsa05170](#) Human immunodeficiency virus 1 infection - Homo sapiens (human) (22)

- [hsa04152](#) AMPK signaling pathway - Homo sapiens (human) (22)
- [hsa03040](#) Spliceosome - Homo sapiens (human) (22)
- [hsa04722](#) Neurotrophin signaling pathway - Homo sapiens (human) (21)
- [hsa04916](#) Melanogenesis - Homo sapiens (human) (21)
- [hsa05226](#) Gastric cancer - Homo sapiens (human) (21)
- [hsa04060](#) Cytokine-cytokine receptor interaction - Homo sapiens (human) (21)
- [hsa04140](#) Autophagy - animal - Homo sapiens (human) (21)
- [hsa04611](#) Platelet activation - Homo sapiens (human) (20)
- [hsa04910](#) Insulin signaling pathway - Homo sapiens (human) (20)
- [hsa05016](#) Huntington disease - Homo sapiens (human) (20)
- [hsa04218](#) Cellular senescence - Homo sapiens (human) (20)
- [hsa04071](#) Sphingolipid signaling pathway - Homo sapiens (human) (20)
- [hsa04211](#) Longevity regulating pathway - Homo sapiens (human) (20)
- [hsa05203](#) Viral carcinogenesis - Homo sapiens (human) (20)
- [hsa05132](#) Salmonella infection - Homo sapiens (human) (20)
- [hsa04072](#) Phospholipase D signaling pathway - Homo sapiens (human) (19)
- [hsa05417](#) Lipid and atherosclerosis - Homo sapiens (human) (19)
- [hsa03015](#) mRNA surveillance pathway - Homo sapiens (human) (19)
- [hsa04750](#) Inflammatory mediator regulation of TRP channels - Homo sapiens (human) (19)
- [hsa05130](#) Pathogenic Escherichia coli infection - Homo sapiens (human) (19)
- [hsa04062](#) Chemokine signaling pathway - Homo sapiens (human) (19)
- [hsa05160](#) Hepatitis C - Homo sapiens (human) (19)
- [hsa04371](#) Apelin signaling pathway - Homo sapiens (human) (19)
- [hsa04928](#) Parathyroid hormone synthesis, secretion and action - Homo sapiens (human) (18)
- [hsa01522](#) Endocrine resistance - Homo sapiens (human) (18)
- [hsa04141](#) Protein processing in endoplasmic reticulum - Homo sapiens (human) (18)
- [hsa04925](#) Aldosterone synthesis and secretion - Homo sapiens (human) (18)
- [hsa05418](#) Fluid shear stress and atherosclerosis - Homo sapiens (human) (18)
- [hsa05166](#) Human T-cell leukemia virus 1 infection - Homo sapiens (human) (18)
- [hsa04621](#) NOD-like receptor signaling pathway - Homo sapiens (human) (17)
- [hsa04912](#) GnRH signaling pathway - Homo sapiens (human) (17)
- [hsa04915](#) Estrogen signaling pathway - Homo sapiens (human) (17)
- [hsa03013](#) RNA transport - Homo sapiens (human) (17)
- [hsa05135](#) Yersinia infection - Homo sapiens (human) (17)
- [hsa04728](#) Dopaminergic synapse - Homo sapiens (human) (17)
- [hsa05167](#) Kaposi sarcoma-associated herpesvirus infection - Homo sapiens (human) (17)
- [hsa04630](#) JAK-STAT signaling pathway - Homo sapiens (human) (17)
- [hsa04724](#) Glutamatergic synapse - Homo sapiens (human) (17)
- [hsa00230](#) Purine metabolism - Homo sapiens (human) (17)
- [hsa05017](#) Spinocerebellar ataxia - Homo sapiens (human) (16)
- [hsa05152](#) Tuberculosis - Homo sapiens (human) (16)
- [hsa04350](#) TGF-beta signaling pathway - Homo sapiens (human) (16)

- [hsa04714](#) Thermogenesis - Homo sapiens (human) (16)
- [hsa04931](#) Insulin resistance - Homo sapiens (human) (16)
- [hsa05231](#) Choline metabolism in cancer - Homo sapiens (human) (16)
- [hsa04012](#) ErbB signaling pathway - Homo sapiens (human) (16)
- [hsa04514](#) Cell adhesion molecules - Homo sapiens (human) (16)
- [hsa04974](#) Protein digestion and absorption - Homo sapiens (human) (15)
- [hsa04540](#) Gap junction - Homo sapiens (human) (15)
- [hsa00564](#) Glycerophospholipid metabolism - Homo sapiens (human) (15)
- [hsa04914](#) Progesterone-mediated oocyte maturation - Homo sapiens (human) (15)
- [hsa05415](#) Diabetic cardiomyopathy - Homo sapiens (human) (15)
- [hsa04725](#) Cholinergic synapse - Homo sapiens (human) (15)
- [hsa05034](#) Alcoholism - Homo sapiens (human) (15)
- [hsa05169](#) Epstein-Barr virus infection - Homo sapiens (human) (15)
- [hsa05414](#) Dilated cardiomyopathy - Homo sapiens (human) (15)
- [hsa04935](#) Growth hormone synthesis, secretion and action - Homo sapiens (human) (15)
- [hsa04670](#) Leukocyte transendothelial migration - Homo sapiens (human) (15)
- [hsa04666](#) Fc gamma R-mediated phagocytosis - Homo sapiens (human) (14)
- [hsa04217](#) Necroptosis - Homo sapiens (human) (14)
- [hsa04520](#) Adherens junction - Homo sapiens (human) (14)
- [hsa05215](#) Prostate cancer - Homo sapiens (human) (14)
- [hsa04919](#) Thyroid hormone signaling pathway - Homo sapiens (human) (14)
- [hsa05410](#) Hypertrophic cardiomyopathy - Homo sapiens (human) (14)
- [hsa04971](#) Gastric acid secretion - Homo sapiens (human) (14)
- [hsa01521](#) EGFR tyrosine kinase inhibitor resistance - Homo sapiens (human) (14)
- [hsa04720](#) Long-term potentiation - Homo sapiens (human) (14)
- [hsa04213](#) Longevity regulating pathway - multiple species - Homo sapiens (human) (14)
- [hsa05214](#) Glioma - Homo sapiens (human) (14)
- [hsa05012](#) Parkinson disease - Homo sapiens (human) (13)
- [hsa04070](#) Phosphatidylinositol signaling system - Homo sapiens (human) (13)
- [hsa04066](#) HIF-1 signaling pathway - Homo sapiens (human) (13)
- [hsa05218](#) Melanoma - Homo sapiens (human) (13)
- [hsa04110](#) Cell cycle - Homo sapiens (human) (13)
- [hsa04926](#) Relaxin signaling pathway - Homo sapiens (human) (13)
- [hsa04730](#) Long-term depression - Homo sapiens (human) (13)
- [hsa05217](#) Basal cell carcinoma - Homo sapiens (human) (13)
- [hsa05020](#) Prion disease - Homo sapiens (human) (13)
- [hsa00514](#) Other types of O-glycan biosynthesis - Homo sapiens (human) (13)
- [hsa04713](#) Circadian entrainment - Homo sapiens (human) (13)
- [hsa04668](#) TNF signaling pathway - Homo sapiens (human) (13)
- [hsa04723](#) Retrograde endocannabinoid signaling - Homo sapiens (human) (13)
- [hsa05235](#) PD-L1 expression and PD-1 checkpoint pathway in cancer - Homo sapiens (human) (12)
- [hsa04622](#) RIG-I-like receptor signaling pathway - Homo sapiens (human) (12)
- [hsa04924](#) Renin secretion - Homo sapiens (human) (12)

- [hsa03018](#) RNA degradation - Homo sapiens (human) (12)
- [hsa04380](#) Osteoclast differentiation - Homo sapiens (human) (12)
- [hsa05171](#) Coronavirus disease - COVID-19 - Homo sapiens (human) (12)
- [hsa04970](#) Salivary secretion - Homo sapiens (human) (11)
- [hsa04932](#) Non-alcoholic fatty liver disease - Homo sapiens (human) (11)
- [hsa04137](#) Mitophagy - animal - Homo sapiens (human) (11)
- [hsa04978](#) Mineral absorption - Homo sapiens (human) (11)
- [hsa05222](#) Small cell lung cancer - Homo sapiens (human) (11)
- [hsa04972](#) Pancreatic secretion - Homo sapiens (human) (11)
- [hsa04922](#) Glucagon signaling pathway - Homo sapiens (human) (11)
- [hsa05162](#) Measles - Homo sapiens (human) (11)
- [hsa04726](#) Serotonergic synapse - Homo sapiens (human) (11)
- [hsa05031](#) Amphetamine addiction - Homo sapiens (human) (11)
- [hsa05100](#) Bacterial invasion of epithelial cells - Homo sapiens (human) (11)
- [hsa04625](#) C-type lectin receptor signaling pathway - Homo sapiens (human) (11)
- [hsa00510](#) N-Glycan biosynthesis - Homo sapiens (human) (11)
- [hsa04917](#) Prolactin signaling pathway - Homo sapiens (human) (11)
- [hsa01240](#) Biosynthesis of cofactors - Homo sapiens (human) (11)
- [hsa04142](#) Lysosome - Homo sapiens (human) (10)
- [hsa04660](#) T cell receptor signaling pathway - Homo sapiens (human) (10)
- [hsa00565](#) Ether lipid metabolism - Homo sapiens (human) (10)
- [hsa03460](#) Fanconi anemia pathway - Homo sapiens (human) (10)
- [hsa05210](#) Colorectal cancer - Homo sapiens (human) (10)
- [hsa04145](#) Phagosome - Homo sapiens (human) (10)
- [hsa05146](#) Amoebiasis - Homo sapiens (human) (10)
- [hsa04620](#) Toll-like receptor signaling pathway - Homo sapiens (human) (10)
- [hsa04210](#) Apoptosis - Homo sapiens (human) (10)
- [hsa04613](#) Neutrophil extracellular trap formation - Homo sapiens (human) (10)
- [hsa05032](#) Morphine addiction - Homo sapiens (human) (10)
- [hsa04115](#) p53 signaling pathway - Homo sapiens (human) (10)
- [hsa04721](#) Synaptic vesicle cycle - Homo sapiens (human) (10)
- [hsa05412](#) Arrhythmogenic right ventricular cardiomyopathy - Homo sapiens (human) (9)
- [hsa04740](#) Olfactory transduction - Homo sapiens (human) (9)
- [hsa04923](#) Regulation of lipolysis in adipocytes - Homo sapiens (human) (9)
- [hsa04933](#) AGE-RAGE signaling pathway in diabetic complications - Homo sapiens (human) (9)
- [hsa04340](#) Hedgehog signaling pathway - Homo sapiens (human) (9)
- [hsa04650](#) Natural killer cell mediated cytotoxicity - Homo sapiens (human) (9)
- [hsa05142](#) Chagas disease - Homo sapiens (human) (9)
- [hsa05221](#) Acute myeloid leukemia - Homo sapiens (human) (9)
- [hsa04727](#) GABAergic synapse - Homo sapiens (human) (9)
- [hsa04658](#) Th1 and Th2 cell differentiation - Homo sapiens (human) (9)
- [hsa04330](#) Notch signaling pathway - Homo sapiens (human) (9)
- [hsa04064](#) NF-kappa B signaling pathway - Homo sapiens (human) (9)

- [hsa05220](#) Chronic myeloid leukemia - Homo sapiens (human) (9)
- [hsa04662](#) B cell receptor signaling pathway - Homo sapiens (human) (8)
- [hsa04961](#) Endocrine and other factor-regulated calcium reabsorption - Homo sapiens (human) (8)
- [hsa05212](#) Pancreatic cancer - Homo sapiens (human) (8)
- [hsa04927](#) Cortisol synthesis and secretion - Homo sapiens (human) (8)
- [hsa01200](#) Carbon metabolism - Homo sapiens (human) (8)
- [hsa04659](#) Th17 cell differentiation - Homo sapiens (human) (8)
- [hsa04913](#) Ovarian steroidogenesis - Homo sapiens (human) (8)
- [hsa04260](#) Cardiac muscle contraction - Homo sapiens (human) (8)
- [hsa05211](#) Renal cell carcinoma - Homo sapiens (human) (8)
- [hsa04911](#) Insulin secretion - Homo sapiens (human) (8)
- [hsa04512](#) ECM-receptor interaction - Homo sapiens (human) (8)
- [hsa05223](#) Non-small cell lung cancer - Homo sapiens (human) (8)
- [hsa04710](#) Circadian rhythm - Homo sapiens (human) (8)
- [hsa00600](#) Sphingolipid metabolism - Homo sapiens (human) (8)
- [hsa04664](#) Fc epsilon RI signaling pathway - Homo sapiens (human) (7)
- [hsa00513](#) Various types of N-glycan biosynthesis - Homo sapiens (human) (7)
- [hsa04920](#) Adipocytokine signaling pathway - Homo sapiens (human) (7)
- [hsa05120](#) Epithelial cell signaling in Helicobacter pylori infection - Homo sapiens (human) (7)
- [hsa05213](#) Endometrial cancer - Homo sapiens (human) (7)
- [hsa05133](#) Pertussis - Homo sapiens (human) (7)
- [hsa04146](#) Peroxisome - Homo sapiens (human) (7)
- [hsa05030](#) Cocaine addiction - Homo sapiens (human) (7)
- [hsa00240](#) Pyrimidine metabolism - Homo sapiens (human) (7)
- [hsa04918](#) Thyroid hormone synthesis - Homo sapiens (human) (7)
- [hsa05145](#) Toxoplasmosis - Homo sapiens (human) (7)
- [hsa04930](#) Type II diabetes mellitus - Homo sapiens (human) (7)
- [hsa05164](#) Influenza A - Homo sapiens (human) (7)
- [hsa04610](#) Complement and coagulation cascades - Homo sapiens (human) (7)
- [hsa00590](#) Arachidonic acid metabolism - Homo sapiens (human) (7)
- [hsa01524](#) Platinum drug resistance - Homo sapiens (human) (7)
- [hsa05134](#) Legionellosis - Homo sapiens (human) (6)
- [hsa04976](#) Bile secretion - Homo sapiens (human) (6)
- [hsa04061](#) Viral protein interaction with cytokine and cytokine receptor - Homo sapiens (human) (6)
- [hsa05110](#) Vibrio cholerae infection - Homo sapiens (human) (6)
- [hsa01230](#) Biosynthesis of amino acids - Homo sapiens (human) (6)
- [hsa05323](#) Rheumatoid arthritis - Homo sapiens (human) (6)
- [hsa05321](#) Inflammatory bowel disease - Homo sapiens (human) (6)
- [hsa04640](#) Hematopoietic cell lineage - Homo sapiens (human) (6)
- [hsa00512](#) Mucin type O-glycan biosynthesis - Homo sapiens (human) (6)
- [hsa04960](#) Aldosterone-regulated sodium reabsorption - Homo sapiens (human) (5)



- [hsa03440](#) Homologous recombination - Homo sapiens (human) (5)
- [hsa04973](#) Carbohydrate digestion and absorption - Homo sapiens (human) (5)
- [hsa04657](#) IL-17 signaling pathway - Homo sapiens (human) (5)
- [hsa00520](#) Amino sugar and nucleotide sugar metabolism - Homo sapiens (human) (5)
- [hsa00562](#) Inositol phosphate metabolism - Homo sapiens (human) (5)
- [hsa00983](#) Drug metabolism - other enzymes - Homo sapiens (human) (5)
- [hsa05230](#) Central carbon metabolism in cancer - Homo sapiens (human) (5)
- [hsa00592](#) alpha-Linolenic acid metabolism - Homo sapiens (human) (5)
- [hsa04370](#) VEGF signaling pathway - Homo sapiens (human) (5)
- [hsa03022](#) Basal transcription factors - Homo sapiens (human) (5)
- [hsa05140](#) Leishmaniasis - Homo sapiens (human) (5)
- [hsa04623](#) Cytosolic DNA-sensing pathway - Homo sapiens (human) (5)
- [hsa00270](#) Cysteine and methionine metabolism - Homo sapiens (human) (5)
- [hsa01040](#) Biosynthesis of unsaturated fatty acids - Homo sapiens (human) (5)
- [hsa00310](#) Lysine degradation - Homo sapiens (human) (5)
- [hsa00190](#) Oxidative phosphorylation - Homo sapiens (human) (5)
- [hsa04136](#) Autophagy - other - Homo sapiens (human) (5)
- [hsa00760](#) Nicotinate and nicotinamide metabolism - Homo sapiens (human) (5)
- [hsa05219](#) Bladder cancer - Homo sapiens (human) (4)
- [hsa04962](#) Vasopressin-regulated water reabsorption - Homo sapiens (human) (4)
- [hsa05216](#) Thyroid cancer - Homo sapiens (human) (4)
- [hsa00260](#) Glycine, serine and threonine metabolism - Homo sapiens (human) (4)
- [hsa04929](#) GnRH secretion - Homo sapiens (human) (4)
- [hsa01212](#) Fatty acid metabolism - Homo sapiens (human) (4)
- [hsa00480](#) Glutathione metabolism - Homo sapiens (human) (4)
- [hsa00982](#) Drug metabolism - cytochrome P450 - Homo sapiens (human) (4)
- [hsa04130](#) SNARE interactions in vesicular transport - Homo sapiens (human) (4)
- [hsa00604](#) Glycosphingolipid biosynthesis - ganglio series - Homo sapiens (human) (4)
- [hsa03008](#) Ribosome biogenesis in eukaryotes - Homo sapiens (human) (4)
- [hsa00591](#) Linoleic acid metabolism - Homo sapiens (human) (4)
- [hsa05033](#) Nicotine addiction - Homo sapiens (human) (4)
- [hsa00561](#) Glycerolipid metabolism - Homo sapiens (human) (4)
- [hsa00534](#) Glycosaminoglycan biosynthesis - heparan sulfate / heparin - Homo sapiens (human) (4)
- [hsa00010](#) Glycolysis / Gluconeogenesis - Homo sapiens (human) (4)
- [hsa00051](#) Fructose and mannose metabolism - Homo sapiens (human) (4)
- [hsa04614](#) Renin-angiotensin system - Homo sapiens (human) (3)
- [hsa04966](#) Collecting duct acid secretion - Homo sapiens (human) (3)
- [hsa04742](#) Taste transduction - Homo sapiens (human) (3)
- [hsa00563](#) Glycosylphosphatidylinositol (GPI)-anchor biosynthesis - Homo sapiens (human) (3)
- [hsa03420](#) Nucleotide excision repair - Homo sapiens (human) (3)
- [hsa03050](#) Proteasome - Homo sapiens (human) (3)
- [hsa01523](#) Antifolate resistance - Homo sapiens (human) (3)

- [hsa00515](#) Mannose type O-glycan biosynthesis - Homo sapiens (human) (3)
- [hsa00770](#) Pantothenate and CoA biosynthesis - Homo sapiens (human) (3)
- [hsa05204](#) Chemical carcinogenesis - Homo sapiens (human) (3)
- [hsa00440](#) Phosphonate and phosphinate metabolism - Homo sapiens (human) (3)
- [hsa00250](#) Alanine, aspartate and glutamate metabolism - Homo sapiens (human) (3)
- [hsa00740](#) Riboflavin metabolism - Homo sapiens (human) (3)
- [hsa04612](#) Antigen processing and presentation - Homo sapiens (human) (3)
- [hsa00380](#) Tryptophan metabolism - Homo sapiens (human) (3)
- [hsa00980](#) Metabolism of xenobiotics by cytochrome P450 - Homo sapiens (human) (3)
- [hsa00052](#) Galactose metabolism - Homo sapiens (human) (3)
- [hsa00280](#) Valine, leucine and isoleucine degradation - Homo sapiens (human) (3)
- [hsa00500](#) Starch and sucrose metabolism - Homo sapiens (human) (3)
- [hsa03450](#) Non-homologous end-joining - Homo sapiens (human) (3)
- [hsa04975](#) Fat digestion and absorption - Homo sapiens (human) (3)
- [hsa00062](#) Fatty acid elongation - Homo sapiens (human) (3)
- [hsa00071](#) Fatty acid degradation - Homo sapiens (human) (3)
- [hsa04977](#) Vitamin digestion and absorption - Homo sapiens (human) (3)
- [hsa04950](#) Maturity onset diabetes of the young - Homo sapiens (human) (3)
- [hsa04216](#) Ferroptosis - Homo sapiens (human) (3)
- [hsa03010](#) Ribosome - Homo sapiens (human) (3)
- [hsa03020](#) RNA polymerase - Homo sapiens (human) (3)
- [hsa00601](#) Glycosphingolipid biosynthesis - lacto and neolacto series - Homo sapiens (human) (3)
- [hsa00511](#) Other glycan degradation - Homo sapiens (human) (2)
- [hsa04672](#) Intestinal immune network for IgA production - Homo sapiens (human) (2)
- [hsa00830](#) Retinol metabolism - Homo sapiens (human) (2)
- [hsa00120](#) Primary bile acid biosynthesis - Homo sapiens (human) (2)
- [hsa05150](#) Staphylococcus aureus infection - Homo sapiens (human) (2)
- [hsa04392](#) Hippo signaling pathway - multiple species - Homo sapiens (human) (2)
- [hsa00220](#) Arginine biosynthesis - Homo sapiens (human) (2)
- [hsa00730](#) Thiamine metabolism - Homo sapiens (human) (2)
- [hsa05310](#) Asthma - Homo sapiens (human) (2)
- [hsa02010](#) ABC transporters - Homo sapiens (human) (2)
- [hsa03060](#) Protein export - Homo sapiens (human) (2)
- [hsa01210](#) 2-Oxocarboxylic acid metabolism - Homo sapiens (human) (2)
- [hsa00330](#) Arginine and proline metabolism - Homo sapiens (human) (2)
- [hsa00360](#) Phenylalanine metabolism - Homo sapiens (human) (2)
- [hsa00620](#) Pyruvate metabolism - Homo sapiens (human) (2)
- [hsa04979](#) Cholesterol metabolism - Homo sapiens (human) (2)
- [hsa00533](#) Glycosaminoglycan biosynthesis - keratan sulfate - Homo sapiens (human) (2)
- [hsa00130](#) Ubiquinone and other terpenoid-quinone biosynthesis - Homo sapiens (human) (2)
- [hsa00100](#) Steroid biosynthesis - Homo sapiens (human) (2)
- [hsa00790](#) Folate biosynthesis - Homo sapiens (human) (2)

- [hsa05340](#) Primary immunodeficiency - Homo sapiens (human) (2)
- [hsa00670](#) One carbon pool by folate - Homo sapiens (human) (2)
- [hsa00430](#) Taurine and hypotaurine metabolism - Homo sapiens (human) (2)
- [hsa03320](#) PPAR signaling pathway - Homo sapiens (human) (2)
- [hsa05322](#) Systemic lupus erythematosus - Homo sapiens (human) (2)
- [hsa03410](#) Base excision repair - Homo sapiens (human) (2)
- [hsa00900](#) Terpenoid backbone biosynthesis - Homo sapiens (human) (2)
- [hsa00350](#) Tyrosine metabolism - Homo sapiens (human) (2)
- [hsa00140](#) Steroid hormone biosynthesis - Homo sapiens (human) (2)
- [hsa05416](#) Viral myocarditis - Homo sapiens (human) (2)
- [hsa05320](#) Autoimmune thyroid disease - Homo sapiens (human) (2)
- [hsa04744](#) Phototransduction - Homo sapiens (human) (2)
- [hsa00860](#) Porphyrin and chlorophyll metabolism - Homo sapiens (human) (2)
- [hsa05144](#) Malaria - Homo sapiens (human) (1)
- [hsa00340](#) Histidine metabolism - Homo sapiens (human) (1)
- [hsa00450](#) Selenocompound metabolism - Homo sapiens (human) (1)
- [hsa00290](#) Valine, leucine and isoleucine biosynthesis - Homo sapiens (human) (1)
- [hsa04964](#) Proximal tubule bicarbonate reclamation - Homo sapiens (human) (1)
- [hsa00030](#) Pentose phosphate pathway - Homo sapiens (human) (1)
- [hsa05143](#) African trypanosomiasis - Homo sapiens (human) (1)
- [hsa00640](#) Propanoate metabolism - Homo sapiens (human) (1)
- [hsa05330](#) Allograft rejection - Homo sapiens (human) (1)
- [hsa04940](#) Type I diabetes mellitus - Homo sapiens (human) (1)
- [hsa05332](#) Graft-versus-host disease - Homo sapiens (human) (1)
- [hsa00630](#) Glyoxylate and dicarboxylate metabolism - Homo sapiens (human) (1)
- [hsa04215](#) Apoptosis - multiple species - Homo sapiens (human) (1)
- [hsa03030](#) DNA replication - Homo sapiens (human) (1)
- [hsa00910](#) Nitrogen metabolism - Homo sapiens (human) (1)
- [hsa00410](#) beta-Alanine metabolism - Homo sapiens (human) (1)
- [hsa00785](#) Lipoic acid metabolism - Homo sapiens (human) (1)
- [hsa00524](#) Neomycin, kanamycin and gentamicin biosynthesis - Homo sapiens (human) (1)
- [hsa00532](#) Glycosaminoglycan biosynthesis - chondroitin sulfate / dermatan sulfate - Homo sapiens (human) (1)
- [hsa00970](#) Aminoacyl-tRNA biosynthesis - Homo sapiens (human) (1)
- [hsa00531](#) Glycosaminoglycan degradation - Homo sapiens (human) (1)
- [hsa00603](#) Glycosphingolipid biosynthesis - globo and isoglobo series - Homo sapiens (human) (1)

#### Brite

[hsa00001](#) KEGG Orthology (KO) (75)

- [hsa03000](#) Transcription factors (51)
- [hsa04121](#) Ubiquitin system (7)



- [hsa01000](#) Enzymes (5)
- [hsa03041](#) Spliceosome (4)
- [hsa03400](#) DNA repair and recombination proteins (4)
- [hsa04990](#) Domain-containing proteins not elsewhere classified (4)
- [hsa03036](#) Chromosome and associated proteins (4)
- [hsa04147](#) Exosome (4)
- [hsa01009](#) Protein phosphatases and associated proteins (2)
- [hsa04131](#) Membrane trafficking (1)
- [hsa03019](#) Messenger RNA biogenesis (1)
- [hsa03021](#) Transcription machinery (1)
- [hsa03029](#) Mitochondrial biogenesis (1)
